# Supplementary material
Source: PubMed Central journal article supplement (PMC4637262)
Supplement: NIHMS726199-supplement-1.pdf [file NIHMS726199-supplement-1.pdf]

# Supplemental Figure 1

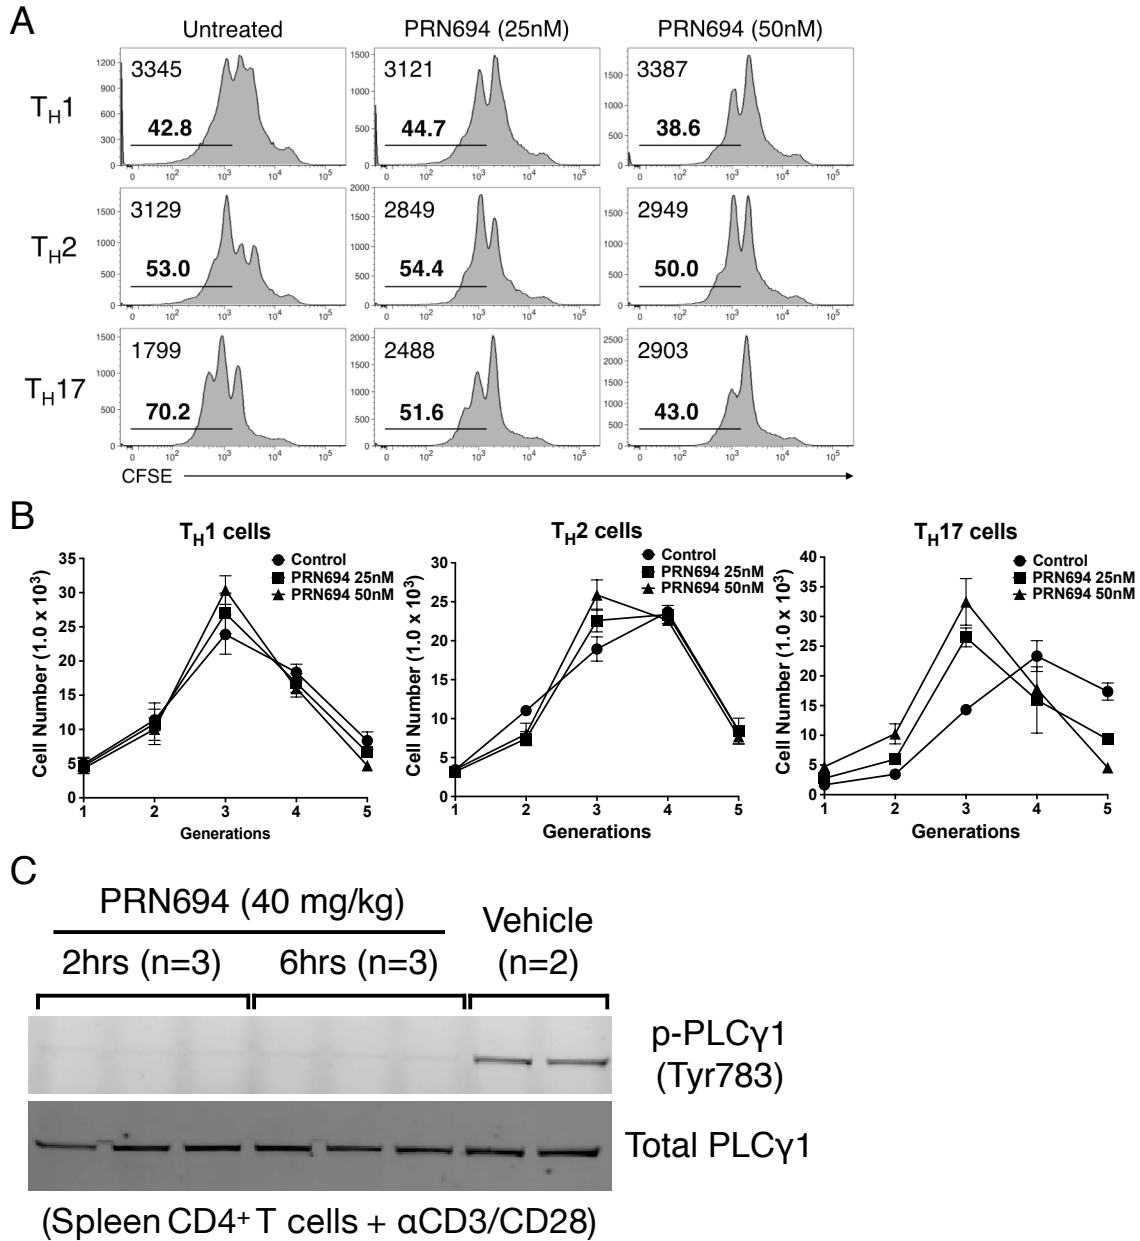

- 1
- 2 Supplemental Figure 1. PRN694 effect on CD4<sup>+</sup> T cell proliferation *in vitro* and
- 3 phosphorylation of PLCγ1 *in vivo*.
- 4 (A-B) CFSE-labeled naïve CD4<sup>+</sup> T cells were stimulated with anti-CD3/CD28 under
- 5 different T<sub>H</sub> polarization conditions for 72hr. Histograms are shown to analyze the

6 magnitude of CD4<sup>+</sup> T cell proliferation. Mean fluorescence intensity of CFSE (Top, left)  
7 and percentages of more-divided (diluted) CD4<sup>+</sup> T cells (Bottom, left) are shown (A).  
8 Calculated CD4<sup>+</sup> T cell numbers of each cell division (Generation #1-5) by FlowJo  
9 software are shown. Data from three experiments were compiled (B). (C) Splenic CD4<sup>+</sup> T  
10 cells isolated from vehicle-dosed (n=2) or PRN694-dosed (40 mg/kg) (2hr post-treatment,  
11 n=3; 6hr post-treatment, n=3) mice were stimulated with anti-CD3/CD28 for 5min and  
12 then lysed to examine the phosphorylation of PLCγ1 (Tyr783) by western blot. Both p-  
13 PLCγ1 (Top) and total PLCγ1 (Bottom) are shown.

# Supplemental Figure 2

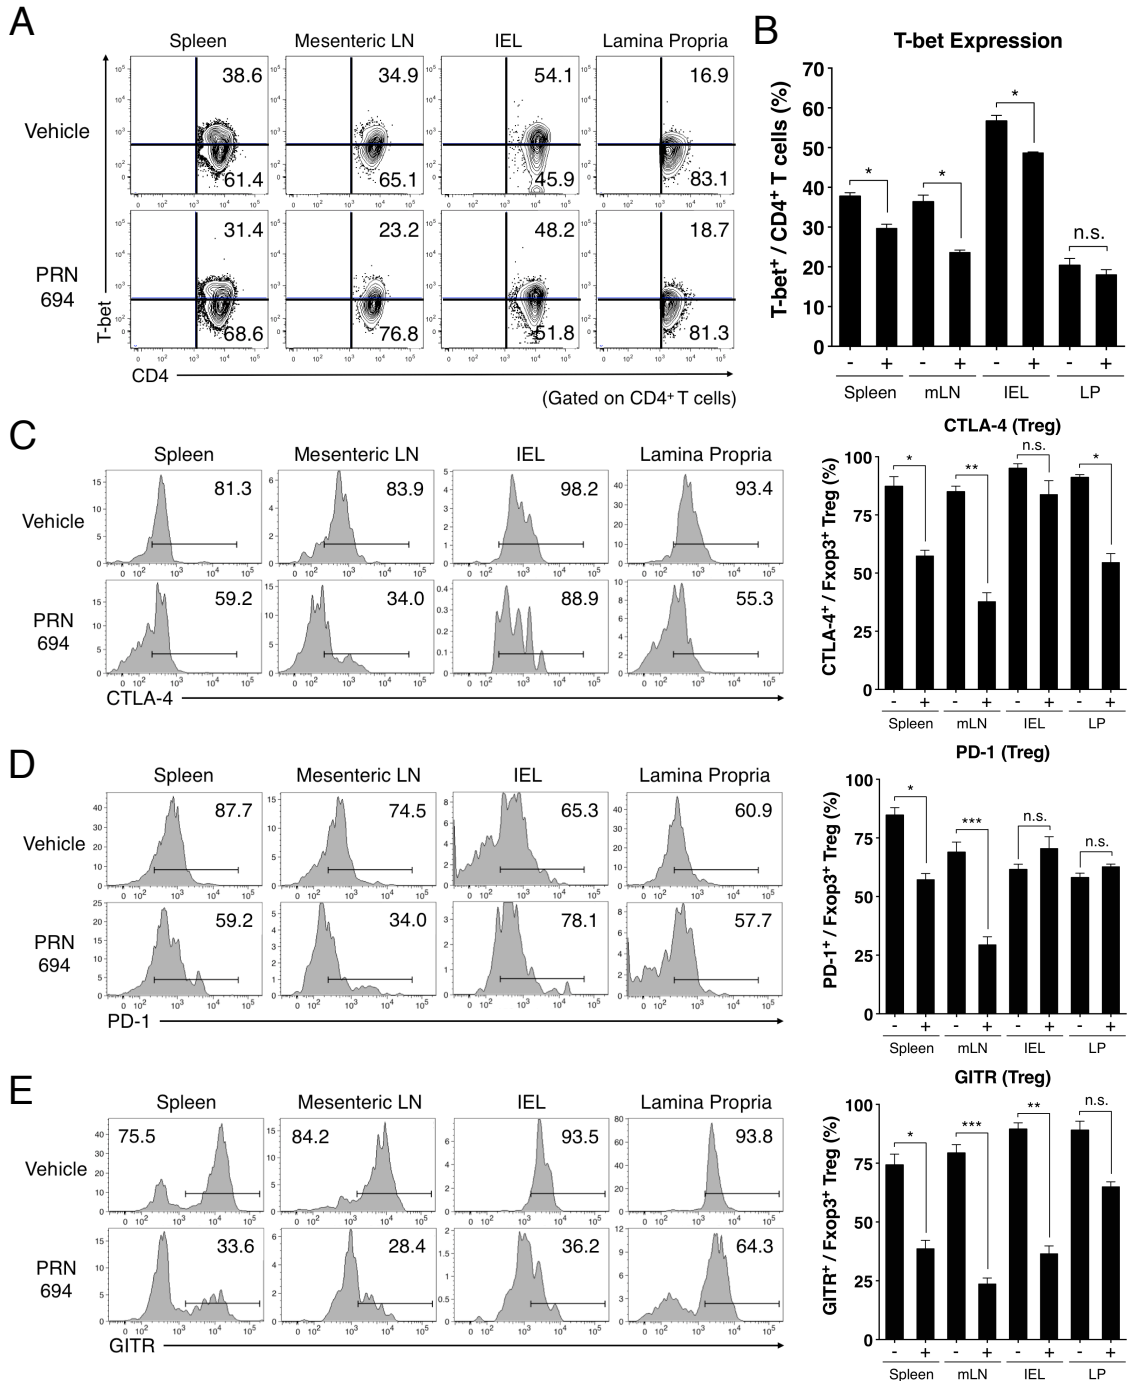

14

15 **Supplemental Figure 2. Transcription factor and surface marker expression on**  
 16 **transferred colitogenic CD4<sup>+</sup> T cells from vehicle-treated and PRN694-treated mice.**

17 (A-B) Isolated CD4<sup>+</sup> T cells from each different organ of vehicle-treated or PRN694-  
18 treated mice at 7 weeks of post-transfer were analyzed for T-bet expression, and the  
19 percentages of T-bet<sup>+</sup> CD4<sup>+</sup> T cells are shown. Graph shows a compilation of data from 3-  
20 5 mice in each group. (C-E) Histograms show the expression of CTLA-4 (C), PD-1 (D),  
21 and GITR (E) on CD4<sup>+</sup> Foxp3<sup>+</sup> Treg cells isolated from spleen, mesenteric LN, intestinal  
22 epithelium (IEL), and lamina propria tissue of vehicle-treated (-) or PRN694-treated (+)  
23 mice. Graphs shown each panel represent the compiled data from 3-5 mice in each group.

# Supplemental Table 1

| Analytes                                                  | Units | Myriad RBM LDD | Myriad RBM LLOQ | Samples       |          |           |           |           |           |           |           |           |           |           |           |
|-----------------------------------------------------------|-------|----------------|-----------------|---------------|----------|-----------|-----------|-----------|-----------|-----------|-----------|-----------|-----------|-----------|-----------|
|                                                           |       |                |                 | PRN694        |          |           |           |           |           |           |           |           |           |           |           |
|                                                           |       |                |                 | Sample 1      | Sample 2 | Sample 3  | Sample 4  | Sample 5  | Sample 6  | Sample 7  | Sample 8  | Sample 9  | Sample 10 | Sample 11 | Sample 12 |
|                                                           |       |                |                 | -             |          |           | -         |           |           | 20nM      |           |           | 5µM       |           |           |
|                                                           |       |                |                 | -             |          |           | +         |           |           | +         |           |           | +         |           |           |
|                                                           |       |                |                 | anti-CD3/CD28 |          |           |           |           |           |           |           |           |           |           |           |
| Alpha-1-Antitrypsin (AAT)                                 | mg/mL | 3.8E-08        | 8.2E-08         | 0.000004      | 0.000002 | 0.0000019 | 0.0000046 | 0.0000038 | 0.0000028 | 0.0000049 | 0.0000034 | 0.0000029 | 0.0000044 | 0.0000024 | 0.0000021 |
| Alpha-2-Macroglobulin (A2Macro)                           | mg/mL | 0.000098       | 0.000087        | 0.00045       | 0.00051  | 0.00052   | 0.00053   | 0.00052   | 0.00045   | 0.00053   | 0.00054   | 0.00053   | 0.00044   | 0.00053   | 0.00050   |
| Beta-2-Microglobulin (B2M)                                | ug/mL | 0.000045       | 0.000051        | 0.0066        | 0.012    | 0.0082    | 0.014     | 0.029     | 0.021     | 0.014     | 0.016     | 0.020     | 0.0047    | 0.012     | 0.0067    |
| Brain-Derived Neurotrophic Factor (BDNF)                  | ng/mL | 0.0046         | 0.0072          | <0.0072       | 0.0098   | <0.0072   | <0.0072   | <0.0072   | <0.0072   | <0.0072   | <0.0072   | <0.0072   | <0.0072   | <0.0072   | <0.0072   |
| C-Reactive Protein (CRP)                                  | ug/mL | 0.000034       | 7.8E-06         | <7.8E-06      | <7.8E-06 | <7.8E-06  | <7.8E-06  | <7.8E-06  | <7.8E-06  | <7.8E-06  | <7.8E-06  | <7.8E-06  | <7.8E-06  | <7.8E-06  | <7.8E-06  |
| Complement C3 (C3)                                        | mg/mL | 1.6E-08        | 1E-07           | 0.000025      | 0.000016 | 0.000001  | 0.000024  | 0.0000019 | 0.0000086 | 0.000025  | 0.0000016 | 0.0000097 | 0.000026  | 0.000014  | 0.0000074 |
| Eotaxin-1                                                 | pg/mL | 1.9            | 29              | <29           | <29      | <29       | <29       | <29       | <29       | <29       | <29       | <29       | <29       | <29       | <29       |
| Factor VII                                                | ng/mL | 1.2            | 0.77            | <0.77         | <0.77    | <0.77     | <0.77     | <0.77     | <0.77     | <0.77     | <0.77     | <0.77     | <0.77     | <0.77     | <0.77     |
| Ferritin (FRTN)                                           | ng/mL | 0.013          | 0.021           | 0.24          | 0.42     | 0.20      | 0.44      | 0.78      | 0.45      | 0.49      | 0.72      | 0.51      | 0.29      | 0.48      | 0.35      |
| Fibrinogen                                                | mg/mL | 0.0000022      | 2.4E-07         | 0.000091      | 0.000047 | 0.000051  | 0.000082  | 0.000047  | 0.000058  | 0.000086  | 0.000047  | 0.000058  | 0.000087  | 0.000034  | 0.000052  |
| Granulocyte-Macrophage Colony-Stimulating Factor (GM-CSF) | pg/mL | 3.2            | 18              | <18           | <18      | <18       | 56        | 297       | 49        | 46        | 257       | 38        | <18       | <18       | <18       |
| Haptoglobin                                               | mg/mL | 0.0000012      | 3.2E-07         | <3.2E-07      | <3.2E-07 | <3.2E-07  | <3.2E-07  | <3.2E-07  | <3.2E-07  | <3.2E-07  | <3.2E-07  | <3.2E-07  | <3.2E-07  | <3.2E-07  | <3.2E-07  |
| Intercellular Adhesion Molecule 1 (ICAM-1)                | ng/mL | 0.35           | 0.26            | <0.26         | <0.26    | <0.26     | <0.26     | 0.28      | <0.26     | <0.26     | 0.28      | <0.26     | <0.26     | <0.26     | <0.26     |
| Interferon gamma (IFN-gamma)                              | pg/mL | 0.49           | 0.30            | <0.30         | <0.30    | <0.30     | 42        | 516       | 52        | 11        | 170       | 5.3       | <0.30     | <0.30     | <0.30     |
| Interleukin-1 alpha (IL-1 alpha)                          | ng/mL | 0.00030        | 0.00040         | <0.0040       | <0.0040  | <0.0040   | 0.0023    | 0.0054    | 0.0032    | 0.00085   | 0.0042    | 0.00047   | <0.0040   | <0.0040   | <0.0040   |
| Interleukin-1 beta (IL-1 beta)                            | pg/mL | 0.30           | 0.57            | 2.8           | .57      | 1.7       | 44        | 126       | 47        | 9.8       | 90        | 11        | .57       | .57       | .57       |
| Interleukin-1 receptor antagonist (IL-1ra)                | pg/mL | 9.9            | 19              | <19           | <19      | <19       | 184       | 218       | 211       | 406       | 417       | 652       | <19       | 46        | <19       |
| Interleukin-2 (IL-2)                                      | pg/mL | 1.0            | 1.7             | 1.7           | 1.7      | 1.7       | 594       | 1800      | 660       | 174       | 787       | 83        | 1.7       | 1.7       | 1.7       |
| Interleukin-3 (IL-3)                                      | ng/mL | 0.0011         | 0.0032          | <0.0032       | <0.0032  | <0.0032   | 0.0036    | 0.0059    | 0.0038    | <0.0032   | <0.0032   | <0.0032   | <0.0032   | <0.0032   | <0.0032   |
| Interleukin-4 (IL-4)                                      | pg/mL | 4.4            | 5.9             | 5.9           | 5.9      | 5.9       | 75        | 131       | 86        | 33        | 97        | 16        | 5.9       | 5.9       | 5.9       |
| Interleukin-5 (IL-5)                                      | pg/mL | 1.0            | 2.6             | 2.6           | 2.6      | 2.6       | 5.6       | 19        | 7.2       | 3.1       | 13        | 2.6       | 2.6       | 2.6       | 2.6       |
| Interleukin-6 (IL-6)                                      | pg/mL | 0.84           | 2.2             | 2.2           | 2.2      | 13        | 104       | 192       | 117       | 18        | 58        | 88        | 2.2       | 2.2       | 3.7       |
| Interleukin-7 (IL-7)                                      | pg/mL | 2.1            | 1.8             | <1.8          | <1.8     | <1.8      | <1.8      | <1.8      | <1.8      | <1.8      | <1.8      | 2.5       | <1.8      | <1.8      | <1.8      |
| Interleukin-8 (IL-8)                                      | pg/mL | 0.63           | 0.79            | 2630          | 489      | 1810      | 18500     | 15900     | 16700     | 14100     | 16100     | 1100      | 1540      | 1650      | 1650      |
| Interleukin-10 (IL-10)                                    | pg/mL | 1.1            | 1.4             | <1.4          | <1.4     | <1.4      | 59        | 97        | 97        | 18        | 29        | 9.4       | <1.4      | <1.4      | <1.4      |
| Interleukin-12 Subunit p40 (IL-12p40)                     | ng/mL | 0.016          | 0.055           | <0.055        | <0.055   | <0.055    | <0.055    | 0.21      | <0.055    | <0.055    | <0.055    | <0.055    | <0.055    | <0.055    | <0.055    |
| Interleukin-12 Subunit p70 (IL-12p70)                     | pg/mL | 5.9            | 9.7             | <9.7          | <9.7     | <9.7      | 132       | 132       | 10        | <9.7      | 24        | <9.7      | <9.7      | <9.7      | <9.7      |
| Interleukin-15 (IL-15)                                    | ng/mL | 0.12           | 0.079           | <0.079        | <0.079   | <0.079    | <0.079    | <0.079    | <0.079    | <0.079    | 0.060     | <0.079    | <0.079    | <0.079    | <0.079    |
| Interleukin-17 (IL-17)                                    | pg/mL | 1.2            | 0.99            | .99           | .99      | .99       | 12        | 8.6       | 10        | 5.0       | 3.7       | 1.6       | .99       | .99       | .99       |
| Interleukin-18 (IL-18)                                    | pg/mL | 3.7            | 8.3             | <8.3          | <8.3     | <8.3      | <8.3      | 16        | 8.3       | <8.3      | 12        | <8.3      | <8.3      | <8.3      | <8.3      |
| Interleukin-23 (IL-23)                                    | ng/mL | 0.12           | 0.080           | <0.080        | <0.080   | <0.080    | <0.080    | <0.080    | <0.080    | <0.080    | <0.080    | <0.080    | <0.080    | <0.080    | <0.080    |
| Macrophage Inflammatory Protein-1 alpha (MIP-1 alpha)     | pg/mL | 8.2            | 8.4             | 198           | 22       | 206       | 4790      | 5810      | 4040      | 6320      | 11800     | 5220      | 53        | 83        | 138       |
| Macrophage Inflammatory Protein-1 beta (MIP-1 beta)       | pg/mL | 4.0            | 6.2             | 1350          | 257      | 1460      | 22600     | 27900     | 23500     | 20300     | 39300     | 17400     | 297       | 391       | 651       |
| Matrix Metalloproteinase-2 (MMP-2)                        | ng/mL | 1.3            | 0.87            | 1.4           | <0.87    | <0.87     | 6.1       | 7.9       | 7.7       | 5.0       | 9.9       | 7.1       | <0.87     | <0.87     | <0.87     |
| Matrix Metalloproteinase-3 (MMP-3)                        | ng/mL | 0.0066         | 0.012           | <0.012        | <0.012   | <0.012    | <0.012    | <0.012    | <0.012    | <0.012    | <0.012    | <0.012    | <0.012    | <0.012    | <0.012    |
| Matrix Metalloproteinase-9 (MMP-9)                        | ng/mL | 5.0            | 7.9             | <7.9          | <7.9     | <7.9      | <7.9      | <7.9      | <7.9      | <7.9      | <7.9      | <7.9      | <7.9      | <7.9      | <7.9      |
| Monocyte Chemoattractant Protein 1 (MCP-1)                | pg/mL | 4.6            | 9.0             | 508           | 206      | 298       | 1710      | 2760      | 2680      | 1550      | 3690      | 2150      | 51        | 144       | 50        |
| Stem Cell Factor (SCF)                                    | pg/mL | 18             | 23              | <23           | <23      | <23       | <23       | <23       | <23       | <23       | <23       | <23       | <23       | <23       | <23       |
| T-Cell-Specific Protein RANTES (RANTES)                   | ng/mL | 0.00018        | 0.0010          | 0.26          | 0.13     | 0.18      | 0.48      | 0.30      | 0.41      | 0.51      | 0.28      | 0.40      | 0.32      | 0.066     | 0.24      |
| Tissue Inhibitor of Metalloproteinases 1 (TIMP-1)         | ng/mL | 0.010          | 0.016           | 3.0           | 2.1      | 2.0       | 2.1       | 1.9       | 1.8       | 2.2       | 1.6       | 2.1       | 1.1       | 1.3       | 0.75      |
| Tumor Necrosis Factor alpha (TNF-alpha)                   | pg/mL | 2.9            | 4.5             | 42            | 6.9      | 53        | 3830      | 7680      | 3270      | 2920      | 6880      | 2340      | 9.0       | 21        | 38        |
| Tumor Necrosis Factor beta (TNF-beta)                     | pg/mL | 2.3            | 1.9             | <1.9          | <1.9     | <1.9      | 11        | 34        | 13        | 5.3       | 24        | 3.5       | <1.9      | <1.9      | <1.9      |
| Tumor necrosis factor receptor 2 (TNFR2)                  | ng/mL | 0.0011         | 0.0057          | 0.077         | 0.071    | 0.053     | 0.21      | 0.24      | 0.22      | 0.23      | 0.26      | 0.26      | 0.053     | 0.057     | 0.052     |
| Vascular Cell Adhesion Molecule-1 (VCAM-1)                | ng/mL | 0.0090         | 0.057           | <0.057        | <0.057   | <0.057    | <0.057    | <0.057    | <0.057    | <0.057    | <0.057    | <0.057    | <0.057    | <0.057    | <0.057    |
| Vascular Endothelial Growth Factor (VEGF)                 | pg/mL | 12             | 6.8             | 12            | 13       | 8.3       | 10        | 14        | 10        | <6.8      | 10        | <6.8      | 8.3       | 14        | <6.8      |
| Vitamin D-Binding Protein (VDBP)                          | ug/mL | 0.00002        | 0.000028        | 0.00037       | 0.000078 | 0.00014   | 0.00039   | 0.00013   | 0.00016   | 0.00039   | 0.000078  | 0.00018   | 0.00036   | 0.000066  | 0.00014   |
| von Willebrand Factor (vWF)                               | ug/mL | 0.0016         | 0.0034          | 0.018         | 0.017    | 0.014     | 0.016     | 0.015     | 0.015     | 0.015     | 0.015     | 0.014     | 0.015     | 0.011     | 0.014     |

24

25 **Supplemental Table 1. Inhibition of cytokines upon anti-CD3/CD28 stimulation of**  
 26 **human PBMC by PRN694 using Human InflammationMap® v.1.0 biomarker**  
 27 **panel.**

28 Shown are the levels of cytokine measured at each condition. The least detectable dose  
 29 (LDD) was determined as the mean + 3 standard deviations of 20 blank readings. The  
 30 LLOQ (Lower Limit of Quantitation) is the lowest concentration of an analyte in a  
 31 sample that can be reliably detected.

## Supplemental Table 2

| Analytes                                                      | Units  | Myriad RIM LDD | Myriad RIM LLOQ | Samples  | Mouse 1 | Mouse 2 | Mouse 3 | Mouse 4 | Mouse 5 | Mouse 6 | Mouse 7 | Mouse 8 | Mouse 9 | Mouse 10 | Mouse 11 | Mouse 12 |
|---------------------------------------------------------------|--------|----------------|-----------------|----------|---------|---------|---------|---------|---------|---------|---------|---------|---------|----------|----------|----------|
|                                                               |        |                |                 | PRN694   | -       |         |         | -       |         |         | +       |         |         | +        |          |          |
|                                                               |        |                |                 | anti-CD3 | -       |         |         | +       |         |         | 1hr     |         |         | 6hr      |          |          |
| Apolipoprotein A-1 (Apo A-1)                                  | ug/mL  | 2.3            | 20              |          | 357     | 543     | 291     | 353     | 244     | 289     | 315     | 312     | 263     | 250      | 193      | 307      |
| C-Reactive Protein Mouse (CRP Mouse)                          | ug/mL  | 0.75           | 2.1             |          | 5.6     | 4.9     | 3.8     | 7.0     | 5.5     | 4.4     | 4.0     | 4.7     | 4.3     | 6.4      | 7.2      | 8.0      |
| CD40 (CD40)                                                   | pg/mL  | 6.7            | 13              |          | 44      | 47      | 38      | 48      | 56      | 81      | 61      | 69      | 62      | 48       | 72       | 116      |
| CD40 Ligand (CD40-L)                                          | pg/mL  | 370            | 428             |          | 1040    | 787     | 443     | 1480    | 1310    | 1840    | 1130    | 1480    | 1310    | 3740     | 3150     | 2960     |
| Eotaxin                                                       | pg/mL  | 3.5            | 6.2             |          | 953     | 1100    | 1200    | 2770    | 3050    | 3910    | 2160    | 3160    | 2270    | 6940     | 8140     | 6050     |
| Epidermal Growth Factor Mouse (EGF Mouse)                     | pg/mL  | 18             | 15              |          | 20      | 17      | 20      | 35      | 40      | 44      | 31      | 29      | 35      | 51       | 60       | 49       |
| Factor VII                                                    | ng/mL  | 25             | 19              |          | 25      | 38      | 27      | 54      | 52      | 68      | 38      | 51      | 47      | 82       | 96       | 70       |
| Fibrinogen                                                    | ug/mL  | 231            | 510             |          | 73100   | 89600   | 70100   | 66000   | 76900   | 62300   | 73900   | 92600   | 74100   | 75900    | 80600    | 117000   |
| Fibroblast Growth Factor 9 (FGF-9)                            | ng/mL  | 2.4            | 2.9             |          | 6.6     | 4.2     | 5.2     | 16      | 16      | 18      | 9.3     | 14      | 14      | 12       | 14       | 16       |
| Fibroblast Growth Factor basic (FGF-basic)                    | ng/mL  | 12             | 15              |          | <15     | <15     | <15     | <15     | <15     | <15     | <15     | <15     | <15     | <15      | <15      | <15      |
| Granulocyte Chemotactic Protein-2 Mouse (GCP-2 Mouse)         | ng/mL  | 0.16           | 0.49            |          | 1.4     | 1.4     | 1.3     | 3.6     | 3.4     | 3.2     | 2.2     | 2.4     | 1.8     | 4.1      | 4.8      | 4.1      |
| Granulocyte-Macrophage Colony-Stimulating Factor (GM-CSF)     | pg/mL  | 4.1            | 6.8             |          | <6.8    | <6.8    | <6.8    | 77      | 281     | 114     | 18      | 33      | 37      | 19       | 32       | 19       |
| Growth Hormone (GH)                                           | ng/mL  | 1.9            | 1.6             |          | 5.7     | 3.0     | 3.0     | 3.0     | 3.5     | 3.5     | 3.5     | 3.3     | 3.0     | 6.0      | 4.2      | 2.6      |
| Growth-Regulated Alpha Protein (KC/GRO)                       | ng/mL  | 0.012          | 0.026           |          | 0.48    | 0.74    | 1.3     | 14      | 11      | 14      | 5.0     | 7.4     | 7.0     | 6.4      | 8.0      | 6.2      |
| Haptoglobin                                                   | ug/mL  | 118            | 121             |          | 131     | 160     | 126     | 125     | 125     | 125     | 127     | 125     | 127     | 144      | 146      | 150      |
| Immunoglobulin A (IgA)                                        | ug/mL  | 18             | 19              |          | 258     | 1460    | 117     | 419     | 342     | 169     | 368     | 144     | 431     | 218      | 258      | 346      |
| Insulin                                                       | uIU/mL | 4.1            | 6.3             |          | <6.3    | <6.3    | <6.3    | <6.3    | <6.3    | <6.3    | <6.3    | <6.3    | <6.3    | <6.3     | <6.3     | <6.3     |
| Interferon gamma (IFN-gamma)                                  | pg/mL  | 15             | 38              |          | <38     | <38     | <38     | 128     | 152     | 98      | <38     | 40      | 47      | 54       | 96       | 80       |
| Interferon gamma Induced Protein 10 (IP-10)                   | pg/mL  | 6.6            | 7.1             |          | 292     | 1740    | 165     | 2940    | 3910    | 2780    | 737     | 2010    | 1490    | 3450     | 3470     | 4190     |
| Interleukin-1 alpha (IL-1 alpha)                              | pg/mL  | 108            | 132             |          | 156     | <132    | <132    | 327     | 312     | 265     | 219     | 281     | 281     | 327      | 296      | 357      |
| Interleukin-1 beta (IL-1 beta)                                | ng/mL  | 6.5            | 3.5             |          | <3.5    | <3.5    | <3.5    | <3.5    | <3.5    | <3.5    | <3.5    | <3.5    | <3.5    | <3.5     | <3.5     | <3.5     |
| Interleukin-2 (IL-2)                                          | pg/mL  | 25             | 49              |          | <49     | <49     | <49     | 428     | 761     | 541     | <49     | <49     | <49     | 69       | 146      | <49      |
| Interleukin-3 (IL-3)                                          | pg/mL  | 2.9            | 4.3             |          | <4.3    | <4.3    | <4.3    | 9.4     | 14      | 8.4     | <4.3    | 4.5     | 5.4     | <4.3     | 6.4      | 5.4      |
| Interleukin-4 (IL-4)                                          | pg/mL  | 52             | 68              |          | <68     | <68     | <68     | 106     | 633     | 224     | <68     | 73      | 87      | <68      | 100      | <68      |
| Interleukin-5 (IL-5)                                          | ng/mL  | 0.47           | 0.75            |          | .75     | .75     | .75     | 0.92    | 0.76    | 0.82    | 1.3     | <0.75   | <0.75   | 3.6      | 3.7      | 0.87     |
| Interleukin-6 (IL-6)                                          | pg/mL  | 2.6            | 3.8             |          | 45      | 21      | 17      | 700     | 1260    | 461     | 206     | 307     | 152     | 119      | 510      | 269      |
| Interleukin-7 (IL-7)                                          | ng/mL  | 0.086          | 0.12            |          | 0.14    | <0.12   | 0.14    | 0.54    | 0.48    | 0.69    | 0.24    | 0.36    | 0.39    | 0.55     | 0.48     | 0.53     |
| Interleukin-10 (IL-10)                                        | pg/mL  | 91             | 220             |          | 220     | 220     | 220     | 762     | 1090    | 979     | 271     | 440     | 504     | 440      | 590      | 376      |
| Interleukin-11 (IL-11)                                        | pg/mL  | 40             | 70              |          | 70      | 70      | 70      | 122     | 122     | 110     | 76      | 110     | 110     | 103      | 122      | 155      |
| Interleukin-12 Subunit p70 (IL-12p70)                         | ng/mL  | 0.12           | 0.14            |          | .14     | .14     | .14     | 0.40    | 0.45    | 0.25    | 0.14    | 0.17    | 0.25    | 0.22     | 0.33     | 0.31     |
| Interleukin-17A (IL-17A)                                      | ng/mL  | 0.0071         | 0.0073          |          | <0.0073 | <0.0073 | <0.0073 | 0.16    | 0.16    | 0.13    | 0.029   | 0.037   | 0.042   | 0.042    | 0.056    | 0.045    |
| Interleukin-18 (IL-18)                                        | ng/mL  | 6.2            | 8.0             |          | 14      | 14      | 12      | 14      | 12      | 14      | 16      | 14      | 14      | 16       | 18       | 20       |
| Leptin                                                        | ng/mL  | 0.026          | 0.053           |          | 1.1     | 0.87    | 0.44    | 0.25    | 0.58    | 0.90    | 1.3     | 1.0     | 1.3     | 0.92     | 0.64     | 1.7      |
| Leukemia Inhibitory Factor (LIF)                              | pg/mL  | 218            | 463             |          | 487     | <463    | <463    | 1530    | 1250    | 1530    | 583     | 1010    | 869     | 1810     | 2360     | 1710     |
| Lymphotactin                                                  | pg/mL  | 19             | 21              |          | 93      | 75      | 67      | 1120    | 1340    | 1420    | 346     | 517     | 508     | 713      | 989      | 919      |
| Macrophage Colony-Stimulating Factor-1 (M-CSF-1)              | ng/mL  | 0.033          | 0.051           |          | 5.7     | 7.4     | 5.5     | 6.1     | 5.4     | 5.1     | 5.9     | 5.1     | 5.8     | 6.7      | 7.3      | 7.0      |
| Macrophage-Derived Chemokine (MDC)                            | pg/mL  | 34             | 55              |          | 1280    | 1220    | 910     | 2180    | 3000    | 2900    | 1500    | 1960    | 1500    | 3870     | 4270     | 3640     |
| Macrophage Inflammatory Protein-1alpha (MIP-1 alpha)          | ng/mL  | 4.1            | 3.3             |          | 3.3     | 3.3     | 3.3     | 4.2     | 3.3     | 4.2     | 3.7     | 3.3     | 3.3     | 5.6      | 6.1      | 6.1      |
| Macrophage Inflammatory Protein-1 beta (MIP-1 beta)           | pg/mL  | 4.7            | 53              |          | 1590    | 960     | 714     | 20100   | 22800   | 25200   | 5960    | 9790    | 10600   | 10200    | 17100    | 12700    |
| Macrophage Inflammatory Protein-1 gamma (MIP-1 gamma)         | ng/mL  | 0.45           | 0.67            |          | 10      | 11      | 12      | 14      | 14      | 11      | 13      | 13      | 12      | 19       | 17       | 18       |
| Macrophage Inflammatory Protein-2 (MIP-2)                     | pg/mL  | 5.3            | 11              |          | 52      | 32      | 36      | 5210    | 3360    | 3420    | 819     | 2270    | 1040    | 711      | 1380     | 1520     |
| Macrophage Inflammatory Protein-3 beta (MIP-3 beta)           | ng/mL  | 0.36           | 1.2             |          | 2.1     | 2.5     | 1.5     | 3.1     | 4.0     | 4.5     | 2.5     | 3.4     | 2.4     | 6.2      | 7.0      | 5.4      |
| Matrix Metalloproteinase-9 (MMP-9)                            | ng/mL  | 9.9            | 14              |          | 66      | 66      | 48      | 168     | 162     | 125     | 109     | 100     | 104     | 100      | 111      | 106      |
| Monocyte Chemotactic Protein 1 (MCP-1)                        | pg/mL  | 4.9            | 7.9             |          | 1810    | 1460    | 1550    | 4390    | 3630    | 4680    | 3170    | 3490    | 3780    | 4110     | 4250     | 4650     |
| Monocyte Chemotactic Protein 3 (MCP-3)                        | pg/mL  | 4.2            | 4.4             |          | 1800    | 1470    | 2060    | 3820    | 4150    | 4170    | 3110    | 3100    | 3610    | 4210     | 4250     | 4430     |
| Monocyte Chemotactic Protein-5 (MCP-5)                        | pg/mL  | 1.7            | 2.3             |          | 172     | 68      | 265     | 1070    | 1180    | 676     | 381     | 374     | 739     | 985      | 1320     | 1080     |
| Myeloperoxidase (MPO)                                         | ng/mL  | 0.48           | 0.66            |          | 102     | 102     | 61      | 115     | 140     | 146     | 100     | 112     | 104     | 191      | 182      | 174      |
| Myoglobin                                                     | ng/mL  | 5.7            | 6.0             |          | 81      | 15      | 9.6     | 380     | 64      | 32      | 109     | 45      | 13      | 103      | 58       | 156      |
| Oncostatin-M (OSM)                                            | ng/mL  | 0.097          | 0.21            |          | 0.42    | 0.22    | 0.27    | 1.0     | 0.96    | 1.1     | 0.62    | 1.0     | 0.88    | 0.98     | 1.2      | 1.2      |
| Plasminogen Activator Inhibitor 1 (PAI-1)                     | ng/mL  | 0.015          | 0.034           |          | 1.5     | 9.2     | 0.73    | 9.0     | 13      | 7.6     | 3.4     | 10      | 9.3     | 11       | 12       | 11       |
| Resistin                                                      | ng/mL  | 0.013          | 0.039           |          | <0.039  | <0.039  | <0.039  | <0.039  | <0.039  | <0.039  | <0.039  | <0.039  | <0.039  | <0.039   | <0.039   | <0.039   |
| Serum Amyloid P-Component (SAP)                               | ug/mL  | 6.4            | 9.0             |          | 45      | 45      | 42      | 56      | 49      | 42      | 39      | 47      | 48      | 42       | 53       | 62       |
| Stem Cell Factor (SCF)                                        | pg/mL  | 153            | 290             |          | 1230    | 934     | 1110    | 3010    | 2470    | 2740    | 2010    | 2270    | 2410    | 2780     | 3130     | 2940     |
| T-Cell-Specific Protein RANTES (RANTES)                       | pg/mL  | 0.026          | 0.028           |          | 0.031   | <0.028  | <0.028  | 0.27    | 0.20    | 0.29    | 0.059   | 0.049   | 0.092   | 0.10     | 0.18     | 0.12     |
| Thrombopoietin                                                | ng/mL  | 30             | 60              |          | <60     | <60     | 76      | 68      | <60     | 60      | 68      | 68      | 60      | 84       | 99       | 95       |
| Tissue Inhibitor of Metalloproteinases 1 Mouse (TIMP-1 Mouse) | ng/mL  | 0.021          | 0.084           |          | 1.5     | 1.6     | 1.3     | 1.8     | 2.0     | 1.2     | 1.2     | 1.3     | 1.1     | 4.6      | 4.5      | 2.7      |
| Tumor Necrosis Factor alpha (TNF-alpha)                       | ng/mL  | 0.029          | 0.11            |          | <0.11   | <0.11   | <0.11   | 0.28    | 0.23    | 0.25    | 0.17    | 0.16    | 0.22    | 0.20     | 0.23     | 0.23     |
| Vascular Cell Adhesion Molecule-1 (VCAM-1)                    | ng/mL  | 3.3            | 5.4             |          | 732     | 894     | 682     | 970     | 953     | 814     | 1040    | 1090    | 877     | 933      | 1060     | 1360     |
| Vascular Endothelial Growth Factor A (VEGF-A)                 | pg/mL  | 222            | 158             |          | 717     | 474     | 756     | 2080    | 1960    | 2280    | 1230    | 1750    | 1690    | 2000     | 2360     | 2320     |
| von Willebrand factor (vWF)                                   | ng/mL  | 27             | 45              |          | 345     | 351     | 457     | 385     | 589     | 446     | 671     | 578     | 731     | 639      | 677      | 655      |

32

33 Supplemental Table 2. Inhibition of cytokines upon anti-CD3 stimulation *in*

34 *in vivo* by PRN694 using RodentMap® v.3.0 biomarker panel.

35 Shown are the levels of cytokine measured at each condition. The least detectable dose

36 (LDD) was determined as the mean + 3 standard deviations of 20 blank readings. The

37 LLOQ (Lower Limit of Quantitation) is the lowest concentration of an analyte in a  
38 sample that can be reliably detected.
